# Supplementary material for: Tissue-specific transcriptomics, chromosomal localization, and phylogeny of chemosensory and odorant binding proteins from the red flour beetle Tribolium castaneum reveal subgroup specificities for olfaction or more general functions
Source: PubMed Central journal article supplement (PMC4377858; doi:10.1186/1471-2164-15-1141), 2014-12-18

**OBP**

- CSP**
- classic OBP**
- ABPII**
- C-OBP**
- C+OBP**

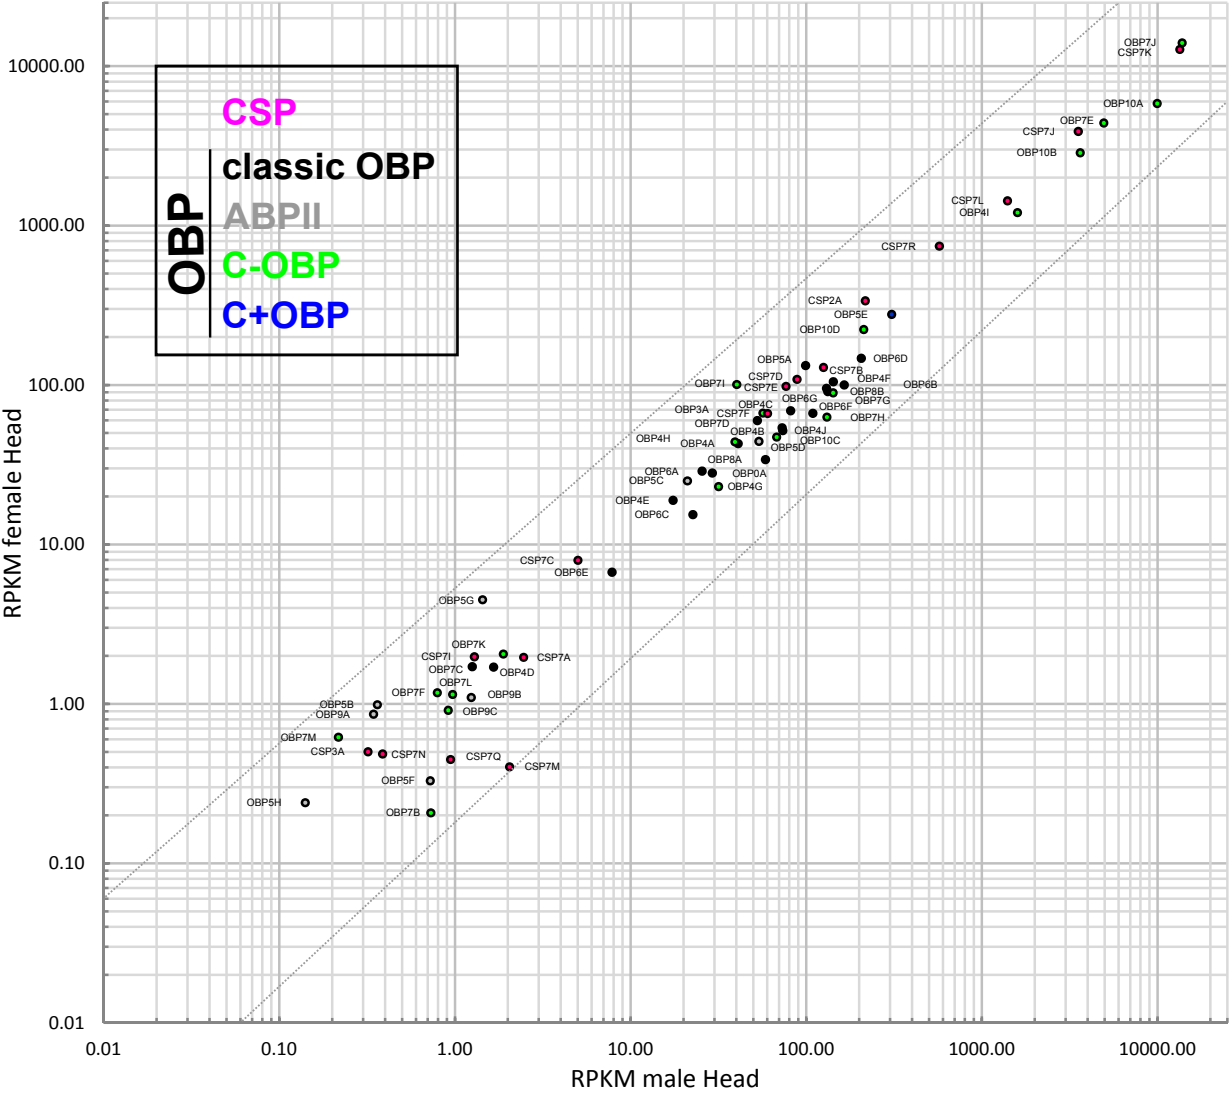

Supplement: 12864_2014_6882_MOESM4_ESM.pdf [file 12864_2014_6882_MOESM4_ESM.pdf]
